# Supplementary material for: A time-stratified, case–crossover study of heat exposure and perinatal mortality from 16 hospitals in sub-Saharan Africa
Source: PubMed Central journal article supplement (PMC11564089; doi:10.1038/s41591-024-03245-7), 2024-09-03
Supplement: 41591_2024_3245_MOESM1_ESM.pdf [file 41591_2024_3245_MOESM1_ESM.pdf]

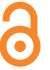

---

# **A time-stratified, case–crossover study of heat exposure and perinatal mortality from 16 hospitals in sub-Saharan Africa**

---

In the format provided by the authors and unedited

---

## Supplementary material

**Supplement Table S1.** Socio-economic and health system of the included countries

**Supplement Table S2.** Associations between temperature indicators the week before birth (lag 0-6) and perinatal mortality (75<sup>th</sup> vs 99<sup>th</sup> percentile).

**Supplement Table S3.** Associations between temperature indicators the week before birth (lag 0-6) and perinatal mortality (50<sup>th</sup> vs 99<sup>th</sup> percentile).

**Supplement Fig. S1.** Flowchart of the study population.

**Supplement Fig. S2.** Distribution of the temperature indicators (average levels the week before birth) by country.

**Table S1.** Socio-economic and health system of the included countries

| Indicator                                                                         | Benin | Malawi | Tanzania | Uganda |
|-----------------------------------------------------------------------------------|-------|--------|----------|--------|
| <b>National Indicators</b>                                                        |       |        |          |        |
| Region in Africa                                                                  | West  | East   | East     | East   |
| Real Gross Domestic Product Per Capita (United States Dollar) (2021) <sup>1</sup> | 3,300 | 1,500  | 2,600    | 2,200  |
| Population (million) (2023) <sup>1</sup>                                          | 14.2  | 21.3   | 65.6     | 47.7   |
| <b>Neonatal Health Indicators</b>                                                 |       |        |          |        |
| Neonatal Mortality Rate (per 1,000 live births) (2021) <sup>2</sup>               | 29    | 19     | 20       | 19     |
| Stillbirth Rate (per 1,000 live births) (2021) <sup>2</sup>                       | 20    | 16     | 18       | 15     |
| <b>Maternal Health Indicators</b>                                                 |       |        |          |        |
| Maternal Mortality Ratio (per 100,000 live births) (2020) <sup>3</sup>            | 523   | 381    | 238      | 284    |
| Antenatal Care <sup>4</sup>                                                       |       |        |          |        |
| ≥1 Visits (%)                                                                     | 83%   | 98%    | 90%      | 95%    |
| ≥4 Visits (%)                                                                     | 52%   | 51%    | 65%      | 57%    |
| Deliveries by Skilled Birth Attendant (%) <sup>4</sup>                            | 78%   | 90%    | 85%      | 74%    |
| Institutional Deliveries (%) <sup>4</sup>                                         | 84%   | 91%    | 81%      | 73%    |
| Cesarean Section Deliveries (%) <sup>4</sup>                                      | 5%    | 6%     | 11%      | 6%     |
| Official User Fees for Childbirth (2021) <sup>4</sup>                             | Yes   | No     | No       | No     |
| Total Fertility Rate                                                              | 4.8   | 3.8    | 4.8      | 4.4    |
| Unmet Need for Family Planning <sup>5</sup>                                       | 26%   | 15%    | 21%      | 20%    |
| <b>Health System Indicators<sup>6</sup></b>                                       |       |        |          |        |
| Medical Doctors (per 10,000 population) (2019)                                    | 0.6   | 0.5    | 0.5      | 1.6    |
| Nursing and Midwifery (per 10,000 population) (2018)                              | 2.9   | 7.0    | 16.9     | 5.6    |
| Current Health Expenditure per Capita (USD) (2021)                                | 35.13 | 46.56  | 37.16    | 43.45  |
| Current Health Expenditure as % of Gross Domestic Product (2021)                  | 2.6%  | 7.4%   | 3.4%     | 4.7%   |
| Out of Pocket Expenditure as a % of Current Health Expenditure (2021)             | 48.6% | 14.1%  | 25.6%    | 31.3%  |

### Sources:

1. CIA. The Global Factbook. 2024. <https://www.cia.gov/the-world-factbook/africa/> (accessed 10 Mar 2024).

2. UN Inter-agency Group for Child Mortality Estimation. Levels and Trends in Child Mortality. 2024. <https://childmortality.org/> (accessed 10 March 2024).

3. World Health Organization. Trends in maternal mortality 2000 to 2020: estimates by WHO, UNICEF, UNFPA, World Bank Group and UNDESA/Population Division. Geneva, 2023.

4. UNICEF. UNICEF Data: Monitoring the situation of children and women 2023. <https://data.unicef.org/> (accessed 24 March 2024) & DHS data 2022 for Tanzania <https://dhsprogram.com/publications/publication-FR382-DHS-Final-Reports.cfm> (accessed 24 March 2024)

5. UNFPA. Population Data Portal. 2023. [https://pdp.unfpa.org/?\\_ga=2.127365005.1866037946.1710834186-817427990.1710834186&country=204&data\\_id=dataSource\\_8-6%3A23%2CdataSource\\_8-1%3A2%2B10%2B11%2CdataSource\\_8-2%3A721%2CdataSource\\_8-5%3A19238&page=Explore-Indicators](https://pdp.unfpa.org/?_ga=2.127365005.1866037946.1710834186-817427990.1710834186&country=204&data_id=dataSource_8-6%3A23%2CdataSource_8-1%3A2%2B10%2B11%2CdataSource_8-2%3A721%2CdataSource_8-5%3A19238&page=Explore-Indicators) (accessed 24 March 2024).

6. World Health Organization. Global Health Observatory (GHO) data. <https://www.who.int/data/gho/data/indicators> (accessed 10 March 2024).

**Supplement Table S2** | Associations between temperature indicators the week before birth (lag 0-6) and perinatal mortality (75<sup>th</sup> vs 99<sup>th</sup> percentile).

| Country                 | Stillbirth            |                          | Antepartum stillbirth |                          | Intrapartum stillbirth |                          | Perinatal death       |                          |
|-------------------------|-----------------------|--------------------------|-----------------------|--------------------------|------------------------|--------------------------|-----------------------|--------------------------|
|                         | 75 <sup>th</sup> (°C) | OR (95%CI)               | 75 <sup>th</sup> (°C) | OR (95%CI)               | 75 <sup>th</sup> (°C)  | OR (95%CI)               | 75 <sup>th</sup> (°C) | OR (95%CI)               |
| <b>Mean temperature</b> |                       |                          |                       |                          |                        |                          |                       |                          |
| Benin                   | 28.0                  | 1.14 (0.65; 2.01)        | 27.9                  | 1.53 (0.60; 3.88)        | 28.0                   | 0.71 (0.34; 1.48)        | 28.0                  | 1.30 (0.76; 2.20)        |
| Malawi                  | 22.1                  | 1.66 (0.83; 3.33)        | 22.2                  | 1.10 (0.40; 3.03)        | 22.0                   | 2.81 (1.06; 7.41)        | 22.5                  | 1.39 (0.76; 2.52)        |
| Tanzania                | 25.9                  | 0.94 (0.30; 2.92)        | 25.9                  | 0.40 (0.07; 2.15)        | 25.8                   | 9.03 (1.01; 80.42)       | 26.0                  | 1.03 (0.39; 2.69)        |
| Uganda                  | 22.7                  | 1.32 (0.82; 2.15)        | 22.8                  | 1.31 (0.58; 2.97)        | 22.7                   | 1.39 (0.74; 2.61)        | 22.7                  | 1.42 (0.91; 2.22)        |
| <b>Meta-analysis</b>    |                       | <b>1.29 (0.95; 1.77)</b> |                       | <b>1.18 (0.71; 1.95)</b> |                        | <b>1.64 (0.74; 3.63)</b> |                       | <b>1.34 (1.01; 1.78)</b> |
| <b>Max temperature</b>  |                       |                          |                       |                          |                        |                          |                       |                          |
| Benin                   | 31.4                  | 1.07 (0.67; 1.71)        | 31.3                  | 1.01 (0.52; 1.99)        | 31.4                   | 1.05 (0.55; 2.00)        | 31.1                  | 1.10 (0.71; 1.70)        |
| Malawi                  | 27.7                  | 2.10 (0.97; 4.55)        | 27.8                  | 1.87 (0.60; 5.84)        | 27.6                   | 3.02 (0.98; 9.25)        | 28.2                  | 1.83 (0.94; 3.59)        |
| Tanzania                | 31.9                  | 0.57 (0.14; 2.32)        | 31.9                  | 0.18 (0.02; 1.66)        | 31.7                   | 3.72 (0.41; 33.88)       | 31.7                  | 0.56 (0.16; 1.93)        |
| Uganda                  | 26.8                  | 1.24 (0.70; 2.21)        | 26.8                  | 1.35 (0.53; 3.47)        | 26.8                   | 1.01 (0.46; 2.19)        | 27.0                  | 1.35 (0.79; 2.28)        |
| <b>Meta-analysis</b>    |                       | <b>1.22 (0.89; 1.68)</b> |                       | <b>1.12 (0.69; 1.82)</b> |                        | <b>1.33 (0.81; 2.20)</b> |                       | <b>1.24 (0.93; 1.66)</b> |
| <b>Min temperature</b>  |                       |                          |                       |                          |                        |                          |                       |                          |
| Benin                   | 25.9                  | 1.36 (0.68; 2.69)        | 25.8                  | 1.64 (0.55; 4.89)        | 26.0                   | 1.23 (0.52; 2.87)        | 25.9                  | 1.57 (0.85; 2.91)        |
| Malawi                  | 17.9                  | 1.27 (0.59; 2.74)        | 18.0                  | 0.97 (0.32; 2.94)        | 17.8                   | 1.56 (0.54; 4.47)        | 18.0                  | 1.07 (0.51; 2.25)        |
| Tanzania                | 22.0                  | 1.37 (0.37; 5.11)        | 22.1                  | 0.69 (0.11; 4.34)        | 22.0                   | 6.24 (0.52; 75.35)       | 22.1                  | 1.31 (0.38; 4.53)        |
| Uganda                  | 19.4                  | 1.26 (0.62; 2.57)        | 19.4                  | 0.49 (0.16; 1.57)        | 19.4                   | 2.33 (0.97; 5.59)        | 19.3                  | 1.21 (0.62; 2.36)        |
| <b>Meta-analysis</b>    |                       | <b>1.30 (0.88; 1.94)</b> |                       | <b>0.91 (0.50; 1.68)</b> |                        | <b>1.74 (1.04; 2.92)</b> |                       | <b>1.30 (0.90; 1.88)</b> |

**Note:** Country-specific and pooled estimates are presented as odds ratio (OR) and 95% confidence intervals obtained from conditional logistic regression models. The estimates show the association of an increase in mean, maximum and minimum temperature (from the 75<sup>th</sup> to the 99<sup>th</sup> percentile) the week before birth (lag 0-6) on stillbirths, antepartum stillbirths, intrapartum stillbirths, and perinatal deaths. The data were obtained from 16 hospitals in four different countries, including Benin (4 hospitals), Malawi (4), Tanzania (4), and Uganda (4). The absolute temperature value (°C) corresponds to the 75<sup>th</sup> percentile for each country, temperature indicator and outcome.

**Supplement Table S3** | Associations between temperature indicators the week before birth (lag 0-6) and perinatal mortality (50<sup>th</sup> vs 99<sup>th</sup> percentile).

| Country                 | Stillbirth            |                          | Antepartum stillbirths |                          | Intrapartum stillbirths |                          | Perinatal death       |                          |
|-------------------------|-----------------------|--------------------------|------------------------|--------------------------|-------------------------|--------------------------|-----------------------|--------------------------|
|                         | 50 <sup>th</sup> (°C) | OR (95%CI)               | 50 <sup>th</sup> (°C)  | OR (95%CI)               | 50 <sup>th</sup> (°C)   | OR (95%CI)               | 50 <sup>th</sup> (°C) | OR (95%CI)               |
| <b>Mean temperature</b> |                       |                          |                        |                          |                         |                          |                       |                          |
| Benin                   | 27.1                  | 0.95 (0.53; 1.71)        | 27.0                   | 1.20 (0.45; 3.16)        | 27.2                    | 0.63 (0.30; 1.34)        | 27.1                  | 1.09 (0.63; 1.89)        |
| Malawi                  | 20.1                  | 1.34 (0.65; 2.74)        | 20.2                   | 1.05 (0.37; 3.00)        | 20.0                    | 1.81 (0.66; 5.00)        | 20.1                  | 1.11 (0.60; 2.07)        |
| Tanzania                | 24.6                  | 1.04 (0.35; 3.09)        | 24.6                   | 0.38 (0.07; 1.89)        | 24.7                    | 9.54 (1.17; 77.72)       | 24.7                  | 1.06 (0.42; 2.67)        |
| Uganda                  | 22.0                  | 1.36 (0.84; 2.22)        | 22.0                   | 1.31 (0.58; 2.97)        | 21.9                    | 1.42 (0.75; 2.69)        | 22.0                  | 1.46 (0.93; 2.30)        |
| <b>Meta-analysis</b>    |                       | <b>1.19 (0.87; 1.64)</b> |                        | <b>1.07 (0.65; 1.79)</b> |                         | <b>1.41 (0.67; 2.96)</b> |                       | <b>1.23 (0.92; 1.64)</b> |
| <b>Max temperature</b>  |                       |                          |                        |                          |                         |                          |                       |                          |
| Benin                   | 29.9                  | 1.23 (0.71; 2.12)        | 29.8                   | 1.03 (0.46; 2.31)        | 30.0                    | 1.29 (0.61; 2.74)        | 29.9                  | 1.20 (0.72; 2.02)        |
| Malawi                  | 24.9                  | 1.69 (0.77; 3.70)        | 25.1                   | 1.65 (0.53; 5.19)        | 24.8                    | 2.04 (0.66; 6.28)        | 25.0                  | 1.48 (0.75; 2.92)        |
| Tanzania                | 29.6                  | 0.53 (0.14; 2.04)        | 29.6                   | 0.17 (0.02; 1.32)        | 29.6                    | 3.34 (0.40; 28.04)       | 29.6                  | 0.54 (0.17; 1.75)        |
| Uganda                  | 25.7                  | 1.27 (0.70; 2.29)        | 25.8                   | 1.44 (0.56; 3.75)        | 25.7                    | 0.99 (0.45; 2.18)        | 25.8                  | 1.38 (0.80; 2.37)        |
| <b>Meta-analysis</b>    |                       | <b>1.25 (0.88; 1.76)</b> |                        | <b>1.12 (0.66; 1.90)</b> |                         | <b>1.33 (0.83; 2.15)</b> |                       | <b>1.24 (0.91; 1.71)</b> |
| <b>Min temperature</b>  |                       |                          |                        |                          |                         |                          |                       |                          |
| Benin                   | 25.0                  | 1.20 (0.62; 2.33)        | 24.8                   | 1.49 (0.51; 4.36)        | 25.1                    | 1.08 (0.47; 2.45)        | 25.0                  | 1.39 (0.76; 2.55)        |
| Malawi                  | 15.9                  | 1.10 (0.52; 2.35)        | 16.0                   | 0.91 (0.31; 2.68)        | 15.8                    | 1.26 (0.44; 3.60)        | 15.8                  | 0.93 (0.45; 1.89)        |
| Tanzania                | 20.9                  | 1.34 (0.36; 5.03)        | 20.9                   | 0.66 (0.11; 4.13)        | 20.9                    | 4.63 (0.44; 48.71)       | 21.0                  | 1.21 (0.36; 4.06)        |
| Uganda                  | 18.8                  | 1.30 (0.66; 2.55)        | 18.8                   | 0.58 (0.19; 1.73)        | 18.8                    | 2.20 (0.96; 5.04)        | 18.8                  | 1.25 (0.67; 2.35)        |
| <b>Meta-analysis</b>    |                       | <b>1.22 (0.83; 1.78)</b> |                        | <b>0.90 (0.50; 1.62)</b> |                         | <b>1.54 (0.94; 2.54)</b> |                       | <b>1.20 (0.84; 1.71)</b> |

**Note:** Country-specific and pooled estimates are presented as odds ratio (OR) and 95% confidence intervals obtained from conditional logistic regression models. The estimates show the association of an increase in mean, maximum and minimum temperature (from the 50<sup>th</sup> to the 99<sup>th</sup> percentile) the week before birth (lag 0-6) on stillbirths, antepartum stillbirths, intrapartum stillbirths, and perinatal deaths. The data were obtained from 16 hospitals in four different countries, including Benin (4 hospitals), Malawi (4), Tanzania (4), and Uganda (4). The absolute temperature value (°C) corresponds to the 50<sup>th</sup> percentile for each country, temperature indicator and outcome.

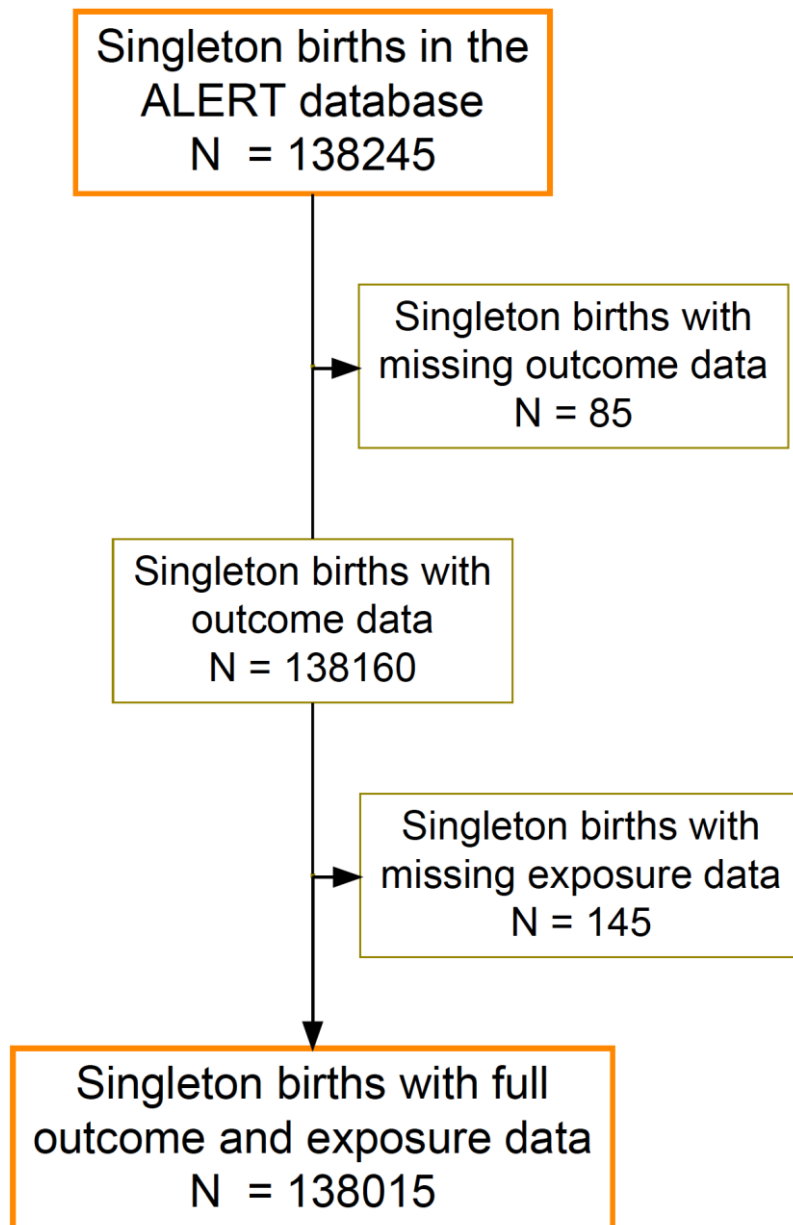

**Supplement Fig. S1** | Flowchart of the study population.

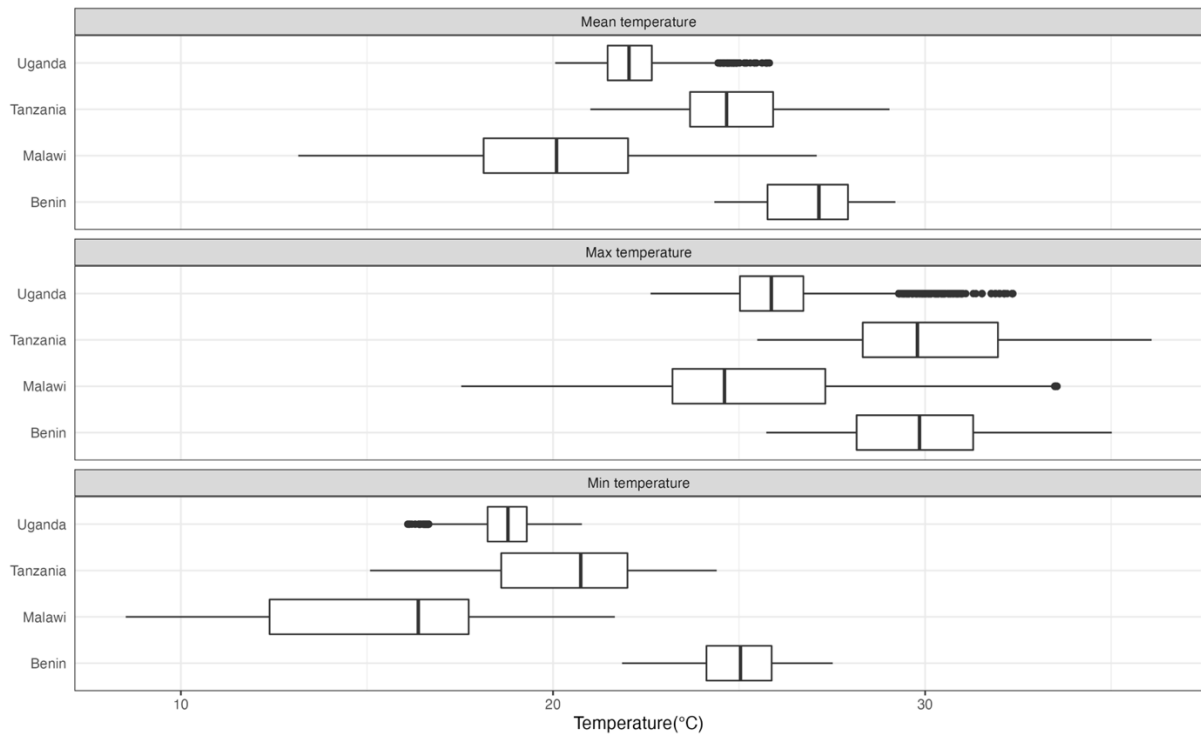

**Supplement Fig. S2** Distribution of the temperature indicators (average levels the week before birth) by country.

The figure depicts the mean, maximum and minimum temperatures (°C) average levels the week before birth by country. The boxplot depicting mean, quartiles, minimum, maximum and outliers ( $>/<1.5x$  interquartile range).
