# Supplementary material for: A time-stratified, case–crossover study of heat exposure and perinatal mortality from 16 hospitals in sub-Saharan Africa
Source: PubMed Central journal article supplement (PMC11564089; doi:10.1038/s41591-024-03245-7), 2024-09-03
Supplement: 41591_2024_3245_MOESM3_ESM.pdf [file 41591_2024_3245_MOESM3_ESM.pdf]

-----Summary descriptives table by 'country'-----

|                       | [ALL]          | Benin         | Malawi        |
|-----------------------|----------------|---------------|---------------|
| Tanzania              | Uganda         |               |               |
| N=23811               | N=138015       | N=26390       | N=50491       |
|                       | N=37323        |               |               |
| -----                 |                |               |               |
| all_still:            |                |               |               |
| No                    | 133121 (96.5%) | 24496 (92.8%) | 49547 (98.1%) |
| (98.5%) 35636 (95.5%) |                |               | 23442         |
| Yes                   | 4886 (3.5%)    | 1893 (7.2%)   | 944 (1.9%)    |
| (1.5%) 1680 (4.5%)    |                |               | 369           |
| intra_still:          |                |               |               |
| No                    | 135273 (98.0%) | 25288 (95.8%) | 50022 (99.1%) |
| (99.3%) 36311 (97.3%) |                |               | 23652         |
| Yes                   | 2734 (2.0%)    | 1101 (4.2%)   | 469 (0.9%)    |
| (0.7%) 1005 (2.7%)    |                |               | 159           |
| ante_still:           |                |               |               |
| No                    | 135855 (98.4%) | 25597 (97.0%) | 50016 (99.1%) |
| (99.1%) 36641 (98.2%) |                |               | 23601         |
| Yes                   | 2152 (1.6%)    | 792 (3.0%)    | 475 (0.9%)    |
| (0.9%) 675 (1.8%)     |                |               | 210           |
| per_mort:             |                |               |               |
| No                    | 132135 (95.7%) | 24280 (92.0%) | 49206 (97.5%) |
| (98.0%) 35307 (94.6%) |                |               | 23342         |
| Yes                   | 5880 (4.3%)    | 2110 (8.0%)   | 1285 (2.5%)   |
| (2.0%) 2016 (5.4%)    |                |               | 469           |
| mat_age:              |                |               |               |
| <35                   | 122371 (88.8%) | 22435 (85.1%) | 45939 (91.2%) |
| (84.1%) 33978 (91.0%) |                |               | 20019         |
| >=35                  | 15499 (11.2%)  | 3943 (14.9%)  | 4424 (8.8%)   |
| (15.9%) 3340 (9.0%)   |                |               | 3792          |
| referred:             |                |               |               |
| No                    | 112454 (81.7%) | 12190 (46.2%) | 45859 (90.8%) |
| (95.2%) 31728 (85.8%) |                |               | 22677         |
| Yes                   | 25199 (18.3%)  | 14191 (53.8%) | 4629 (9.2%)   |
| (4.8%) 5246 (14.2%)   |                |               | 1133          |
| q11hiv:               |                |               |               |
| No                    | 120899 (96.9%) | 21257 (98.4%) | 42254 (96.2%) |
| (96.9%) 34360 (96.6%) |                |               | 23028         |
| Yes                   | 3932 (3.1%)    | 353 (1.6%)    | 1658 (3.8%)   |
| (3.1%) 1191 (3.4%)    |                |               | 730           |
| ht:                   |                |               |               |
| No                    | 129129 (93.6%) | 21345 (80.9%) | 49614 (98.3%) |
| (95.3%) 35488 (95.1%) |                |               | 22682         |
| Yes                   | 8853 (6.4%)    | 5032 (19.1%)  | 877 (1.7%)    |
| (4.7%) 1815 (4.9%)    |                |               | 1129          |
| preg_num:             |                |               |               |
| 1st                   | 51212 (37.1%)  | 7264 (27.6%)  | 22914 (45.4%) |
|                       |                |               | 8485          |

|                 |                |               |               |       |  |
|-----------------|----------------|---------------|---------------|-------|--|
| (35.6%)         | 12549 (33.6%)  |               |               |       |  |
| 2 or +          | 86727 (62.9%)  | 19100 (72.4%) | 27542 (54.6%) | 15325 |  |
| (64.4%)         | 24760 (66.4%)  |               |               |       |  |
| q29sex:         |                |               |               |       |  |
| Girl            | 67448 (48.9%)  | 12506 (47.4%) | 24442 (48.4%) | 11783 |  |
| (49.5%)         | 18717 (50.2%)  |               |               |       |  |
| Boy             | 70516 (51.1%)  | 13866 (52.6%) | 26033 (51.6%) | 12022 |  |
| (50.5%)         | 18595 (49.8%)  |               |               |       |  |
| preterm:        |                |               |               |       |  |
| No              | 118282 (87.5%) | 21676 (83.0%) | 44511 (89.4%) | 20568 |  |
| (86.5%)         | 31527 (88.9%)  |               |               |       |  |
| Yes             | 16848 (12.5%)  | 4432 (17.0%)  | 5284 (10.6%)  | 3197  |  |
| (13.5%)         | 3935 (11.1%)   |               |               |       |  |
| low_bw:         |                |               |               |       |  |
| No              | 120246 (87.4%) | 21298 (81.0%) | 44052 (87.6%) | 21151 |  |
| (88.9%)         | 33745 (90.8%)  |               |               |       |  |
| Yes             | 17311 (12.6%)  | 4982 (19.0%)  | 6262 (12.4%)  | 2652  |  |
| (11.1%)         | 3415 (9.2%)    |               |               |       |  |
| prol_obst_lab:  |                |               |               |       |  |
| No              | 127258 (92.2%) | 24773 (93.9%) | 46281 (91.7%) | 21421 |  |
| (90.0%)         | 34783 (93.2%)  |               |               |       |  |
| Yes             | 10757 (7.8%)   | 1617 (6.1%)   | 4210 (8.3%)   | 2390  |  |
| (10.0%)         | 2540 (6.8%)    |               |               |       |  |
| deliv_mode:     |                |               |               |       |  |
| Spontaneous     | 98488 (71.4%)  | 13578 (51.5%) | 41171 (81.5%) | 16887 |  |
| (70.9%)         | 26852 (72.0%)  |               |               |       |  |
| Caesarean       | 38143 (27.6%)  | 12477 (47.3%) | 8561 (17.0%)  | 6758  |  |
| (28.4%)         | 10347 (27.7%)  |               |               |       |  |
| Others          | 1376 (1.0%)    | 332 (1.3%)    | 759 (1.5%)    | 165   |  |
| (0.7%)          | 120 (0.3%)     |               |               |       |  |
| aph:            |                |               |               |       |  |
| No              | 136092 (98.6%) | 25650 (97.2%) | 50141 (99.3%) | 23641 |  |
| (99.3%)         | 36660 (98.2%)  |               |               |       |  |
| Yes             | 1923 (1.4%)    | 740 (2.8%)    | 350 (0.7%)    | 170   |  |
| (0.7%)          | 663 (1.8%)     |               |               |       |  |
| temp_week_9     | 22.8 (3.3)     | 26.9 (1.2)    | 20.1 (2.9)    | 24.8  |  |
| (1.6)           | 22.1 (0.8)     |               |               |       |  |
| temp_week_min_9 | 19.0 (4.1)     | 25.0 (1.1)    | 15.3 (3.1)    | 20.3  |  |
| (2.0)           | 18.8 (0.8)     |               |               |       |  |
| temp_max_week_9 | 27.1 (3.2)     | 29.8 (1.8)    | 25.2 (3.0)    | 30.2  |  |
| (2.2)           | 25.9 (1.4)     |               |               |       |  |

---



---
