# Supplementary material for: A time-stratified, case–crossover study of heat exposure and perinatal mortality from 16 hospitals in sub-Saharan Africa
Source: PubMed Central journal article supplement (PMC11564089; doi:10.1038/s41591-024-03245-7), 2024-09-03
Supplement: 41591_2024_3245_MOESM4_ESM.pdf [file 41591_2024_3245_MOESM4_ESM.pdf]

|                   | Country   | Exposure          | Temp 75th              | Stillbirths | Temp 75th |
|-------------------|-----------|-------------------|------------------------|-------------|-----------|
| Antepartum        | Temp 75th |                   | Intrapartum            |             |           |
| 1:                | Benin     | tmean             | 28.0 1.14 (0.65; 2.01) |             | 27.9      |
| 1.53 (0.60; 3.88) |           | 28.0              | 0.71 (0.34; 1.48)      |             |           |
| 2:                | Malawi    | tmean             | 22.1 1.66 (0.83; 3.33) |             | 22.2      |
| 1.10 (0.40; 3.03) |           | 22.0              | 2.81 (1.06; 7.41)      |             |           |
| 3:                | Tanzania  | tmean             | 25.9 0.94 (0.30; 2.92) |             | 25.9      |
| 0.40 (0.07; 2.15) |           | 25.8              | 9.03 (1.01; 80.42)     |             |           |
| 4:                | Uganda    | tmean             | 22.7 1.32 (0.82; 2.15) |             | 22.8      |
| 1.31 (0.58; 2.97) |           | 22.7              | 1.39 (0.74; 2.61)      |             |           |
| 5: Meta-analysis  |           | tmean             | NA 1.29 (0.95; 1.77)   |             | NA        |
| 1.18 (0.71; 1.95) |           | NA                | 1.64 (0.74; 3.63)      |             |           |
| 6:                | Benin     | tmax              | 31.4 1.07 (0.67; 1.71) |             | 31.3      |
| 1.01 (0.52; 1.99) |           | 31.4              | 1.05 (0.55; 2.00)      |             |           |
| 7:                | Malawi    | tmax              | 27.7 2.10 (0.97; 4.55) |             | 27.8      |
| 1.87 (0.60; 5.84) |           | 27.6              | 3.02 (0.98; 9.25)      |             |           |
| 8:                | Tanzania  | tmax              | 31.9 0.57 (0.14; 2.32) |             | 31.9      |
| 0.18 (0.02; 1.66) |           | 31.7              | 3.72 (0.41; 33.88)     |             |           |
| 9:                | Uganda    | tmax              | 26.8 1.24 (0.70; 2.21) |             | 26.8      |
| 1.35 (0.53; 3.47) |           | 26.8              | 1.01 (0.46; 2.19)      |             |           |
| 10: Meta-analysis |           | tmax              | NA 1.22 (0.89; 1.68)   |             | NA        |
| 1.12 (0.69; 1.82) |           | NA                | 1.33 (0.81; 2.20)      |             |           |
| 11:               | Benin     | tmin              | 25.9 1.36 (0.68; 2.69) |             | 25.8      |
| 1.64 (0.55; 4.89) |           | 26.0              | 1.23 (0.52; 2.87)      |             |           |
| 12:               | Malawi    | tmin              | 17.9 1.27 (0.59; 2.74) |             | 18.0      |
| 0.97 (0.32; 2.94) |           | 17.8              | 1.56 (0.54; 4.47)      |             |           |
| 13:               | Tanzania  | tmin              | 22.0 1.37 (0.37; 5.11) |             | 22.1      |
| 0.69 (0.11; 4.34) |           | 22.0              | 6.24 (0.52; 75.35)     |             |           |
| 14:               | Uganda    | tmin              | 19.4 1.26 (0.62; 2.57) |             | 19.4      |
| 0.49 (0.16; 1.57) |           | 19.4              | 2.33 (0.97; 5.59)      |             |           |
| 15: Meta-analysis |           | tmin              | NA 1.30 (0.88; 1.94)   |             | NA        |
| 0.91 (0.50; 1.68) |           | NA                | 1.74 (1.04; 2.92)      |             |           |
|                   | Temp 75th | Perinatal deaths  |                        |             |           |
| 1:                | 28.0      | 1.30 (0.76; 2.20) |                        |             |           |
| 2:                | 22.2      | 1.39 (0.76; 2.52) |                        |             |           |
| 3:                | 25.9      | 1.03 (0.39; 2.69) |                        |             |           |
| 4:                | 22.7      | 1.42 (0.91; 2.22) |                        |             |           |
| 5:                | NA        | 1.34 (1.01; 1.78) |                        |             |           |
| 6:                | 31.3      | 1.10 (0.71; 1.70) |                        |             |           |
| 7:                | 27.8      | 1.83 (0.94; 3.59) |                        |             |           |
| 8:                | 31.8      | 0.56 (0.16; 1.93) |                        |             |           |
| 9:                | 26.9      | 1.35 (0.79; 2.28) |                        |             |           |
| 10:               | NA        | 1.24 (0.93; 1.66) |                        |             |           |
| 11:               | 25.9      | 1.57 (0.85; 2.91) |                        |             |           |
| 12:               | 17.9      | 1.07 (0.51; 2.25) |                        |             |           |
| 13:               | 22.1      | 1.31 (0.38; 4.53) |                        |             |           |
| 14:               | 19.4      | 1.21 (0.62; 2.36) |                        |             |           |
| 15:               | NA        | 1.30 (0.90; 1.88) |                        |             |           |
| Antepartum        | Country   | Exposure          | Temp 50th              | Stillbirths | Temp 50th |
| Temp 50th         |           |                   | Intrapartum            |             |           |
| 1:                | Benin     | tmean             | 27.1 0.95 (0.53; 1.71) |             | 27.0      |
| 1.20 (0.45; 3.16) |           | 27.2              | 0.63 (0.30; 1.34)      |             |           |
| 2:                | Malawi    | tmean             | 20.1 1.34 (0.65; 2.74) |             | 20.2      |
| 1.05 (0.37; 3.00) |           | 20.0              | 1.81 (0.66; 5.00)      |             |           |

|      |               |       |      |      |               |      |
|------|---------------|-------|------|------|---------------|------|
| 3:   | Tanzania      | tmean | 24.6 | 1.04 | (0.35; 3.09)  | 24.6 |
|      |               |       | 24.7 | 9.54 | (1.17; 77.72) |      |
| 0.38 | (0.07; 1.89)  |       |      |      |               |      |
| 4:   | Uganda        | tmean | 22.0 | 1.36 | (0.84; 2.22)  | 22.0 |
|      |               |       | 21.9 | 1.42 | (0.75; 2.69)  |      |
| 1.31 | (0.58; 2.97)  |       |      |      |               |      |
| 5:   | Meta-analysis | tmean | NA   | 1.19 | (0.87; 1.64)  | NA   |
|      |               |       | NA   | 1.41 | (0.67; 2.96)  |      |
| 1.07 | (0.65; 1.79)  |       |      |      |               |      |
| 6:   | Benin         | tmax  | 29.9 | 1.23 | (0.71; 2.12)  | 29.8 |
|      |               |       | 30.0 | 1.29 | (0.61; 2.74)  |      |
| 1.03 | (0.46; 2.31)  |       |      |      |               |      |
| 7:   | Malawi        | tmax  | 24.9 | 1.69 | (0.77; 3.70)  | 25.1 |
|      |               |       | 24.8 | 2.04 | (0.66; 6.28)  |      |
| 1.65 | (0.53; 5.19)  |       |      |      |               |      |
| 8:   | Tanzania      | tmax  | 29.6 | 0.53 | (0.14; 2.04)  | 29.6 |
|      |               |       | 29.6 | 3.34 | (0.40; 28.04) |      |
| 0.17 | (0.02; 1.32)  |       |      |      |               |      |
| 9:   | Uganda        | tmax  | 25.7 | 1.27 | (0.70; 2.29)  | 25.8 |
|      |               |       | 25.7 | 0.99 | (0.45; 2.18)  |      |
| 1.44 | (0.56; 3.75)  |       |      |      |               |      |
| 10:  | Meta-analysis | tmax  | NA   | 1.25 | (0.88; 1.76)  | NA   |
|      |               |       | NA   | 1.33 | (0.83; 2.15)  |      |
| 1.12 | (0.66; 1.90)  |       |      |      |               |      |
| 11:  | Benin         | tmin  | 25.0 | 1.20 | (0.62; 2.33)  | 24.8 |
|      |               |       | 25.1 | 1.08 | (0.47; 2.45)  |      |
| 1.49 | (0.51; 4.36)  |       |      |      |               |      |
| 12:  | Malawi        | tmin  | 15.9 | 1.10 | (0.52; 2.35)  | 16.0 |
|      |               |       | 15.8 | 1.26 | (0.44; 3.60)  |      |
| 0.91 | (0.31; 2.68)  |       |      |      |               |      |
| 13:  | Tanzania      | tmin  | 20.9 | 1.34 | (0.36; 5.03)  | 20.9 |
|      |               |       | 20.9 | 4.63 | (0.44; 48.71) |      |
| 0.66 | (0.11; 4.13)  |       |      |      |               |      |
| 14:  | Uganda        | tmin  | 18.8 | 1.30 | (0.66; 2.55)  | 18.8 |
|      |               |       | 18.8 | 2.20 | (0.96; 5.04)  |      |
| 0.58 | (0.19; 1.73)  |       |      |      |               |      |
| 15:  | Meta-analysis | tmin  | NA   | 1.22 | (0.83; 1.78)  | NA   |
|      |               |       | NA   | 1.54 | (0.94; 2.54)  |      |
| 0.90 | (0.50; 1.62)  |       |      |      |               |      |

|     | Temp | 50th | Perinatal    | deaths |
|-----|------|------|--------------|--------|
| 1:  | 27.1 | 1.09 | (0.63; 1.89) |        |
| 2:  | 20.1 | 1.11 | (0.60; 2.07) |        |
| 3:  | 24.7 | 1.06 | (0.42; 2.67) |        |
| 4:  | 22.0 | 1.46 | (0.93; 2.30) |        |
| 5:  | NA   | 1.23 | (0.92; 1.64) |        |
| 6:  | 29.9 | 1.20 | (0.72; 2.02) |        |
| 7:  | 25.0 | 1.48 | (0.75; 2.92) |        |
| 8:  | 29.6 | 0.54 | (0.17; 1.75) |        |
| 9:  | 25.8 | 1.38 | (0.80; 2.37) |        |
| 10: | NA   | 1.24 | (0.91; 1.71) |        |
| 11: | 25.0 | 1.39 | (0.76; 2.55) |        |
| 12: | 15.8 | 0.93 | (0.45; 1.89) |        |
| 13: | 21.0 | 1.21 | (0.36; 4.06) |        |
| 14: | 18.8 | 1.25 | (0.67; 2.35) |        |
| 15: | NA   | 1.20 | (0.84; 1.71) |        |

|      | beta      | se        | i2      | model       | cen        | low               |
|------|-----------|-----------|---------|-------------|------------|-------------------|
| high | or        | or_low    | or_high |             |            |                   |
| 1:   | 0.2563587 | 0.1594405 | 0.00    | Stillbirth  | 75th       | -0.056138846      |
|      | 0.5688563 | 1.29      | 0.95    |             |            | 1.77              |
| 2:   | 0.4920003 | 0.4066746 | 0.63    | Intrapartum | stillbirth | 75th -0.305067208 |
|      | 1.2890678 | 1.64      | 0.74    |             |            | 3.63              |
| 3:   | 0.1665774 | 0.2565032 | 0.00    | Antepartum  | stillbirth | 75th -0.336159558 |
|      | 0.6693144 | 1.18      | 0.71    |             |            | 1.95              |
| 4:   | 0.2918684 | 0.1444793 | 0.00    | Perinatal   | death      | 75th 0.008694206  |
|      | 0.5750426 | 1.34      | 1.01    |             |            | 1.78              |
| 5:   | 0.6479472 | 0.2701562 | 0.36    | Stillbirth  | 75th       | 0.118450702       |
|      | 1.1774437 | 1.91      | 1.13    |             |            | 3.25              |

|      |              |               |         |                             |               |
|------|--------------|---------------|---------|-----------------------------|---------------|
| 6:   | 1.3210822    | 0.8215560     | 0.75    | Intrapartum stillbirth 75th | -0.289137916  |
|      | 2.9313024    | 3.75          | 0.75    | 18.75                       |               |
| 7:   | 0.5441817    | 0.3633788     | 0.35    | Antepartum stillbirth 75th  | -0.168027587  |
|      | 1.2563910    | 1.72          | 0.85    | 3.51                        |               |
| 8:   | 0.6709859    | 0.1982922     | 0.02    | Perinatal death 75th        | 0.282340362   |
|      | 1.0596314    | 1.96          | 1.33    | 2.89                        |               |
|      |              | hr_all        |         | time                        |               |
| 1:   | 1.29         | (0.95; 1.77)  |         | Whole year                  |               |
| 2:   | 1.64         | (0.74; 3.63)  |         | Whole year                  |               |
| 3:   | 1.18         | (0.71; 1.95)  |         | Whole year                  |               |
| 4:   | 1.34         | (1.01; 1.78)  |         | Whole year                  |               |
| 5:   | 1.91         | (1.13; 3.25)  |         | Hottest months              |               |
| 6:   | 3.75         | (0.75; 18.75) |         | Hottest months              |               |
| 7:   | 1.72         | (0.85; 3.51)  |         | Hottest months              |               |
| 8:   | 1.96         | (1.33; 2.89)  |         | Hottest months              |               |
|      |              | beta          | se      | i2                          | model cen low |
| high | or           | or_low        | or_high |                             |               |
| 1:   | 0.106156190  | 0.10135102    | 0.00    | All stillbirth 75th         | -0.092488154  |
|      | 0.3048005    | 1.11          | 0.91    | 1.36                        |               |
| 2:   | -0.005482957 | 0.24728171    | 0.56    | Intra stillbirth 75th       | -0.490146205  |
|      | 0.4791803    | 0.99          | 0.61    | 1.61                        |               |
| 3:   | 0.300370267  | 0.15274528    | 0.00    | Antermortum 75th            | 0.000995015   |
|      | 0.5997455    | 1.35          | 1.00    | 1.82                        |               |
| 4:   | 0.160706811  | 0.09214322    | 0.00    | Pernatal death 75th         | -0.019890590  |
|      | 0.3413042    | 1.17          | 0.98    | 1.41                        |               |
| 5:   | 0.161486225  | 0.11210408    | 0.00    | All stillbirth 75th         | -0.058233725  |
|      | 0.3812062    | 1.18          | 0.94    | 1.46                        |               |
| 6:   | 0.055217422  | 0.28921809    | 0.62    | Intra stillbirth 75th       | -0.511639616  |
|      | 0.6220745    | 1.06          | 0.60    | 1.86                        |               |
| 7:   | 0.402397327  | 0.17377204    | 0.00    | Antermortum 75th            | 0.061810396   |
|      | 0.7429843    | 1.50          | 1.06    | 2.10                        |               |
| 8:   | 0.203454486  | 0.10159817    | 0.00    | Pernatal death 75th         | 0.004325732   |
|      | 0.4025832    | 1.23          | 1.00    | 1.50                        |               |
| 9:   | 0.251837605  | 0.12160957    | 0.00    | All stillbirth 75th         | 0.013487234   |
|      | 0.4901880    | 1.29          | 1.01    | 1.63                        |               |
| 10:  | 0.119468110  | 0.21040610    | 0.37    | Intra stillbirth 75th       | -0.292920261  |
|      | 0.5318565    | 1.13          | 0.75    | 1.70                        |               |
| 11:  | 0.407209819  | 0.18944726    | 0.00    | Antermortum 75th            | 0.035900018   |
|      | 0.7785196    | 1.50          | 1.04    | 2.18                        |               |
| 12:  | 0.278730947  | 0.10877872    | 0.00    | Pernatal death 75th         | 0.065528566   |
|      | 0.4919333    | 1.32          | 1.07    | 1.64                        |               |
| 13:  | 0.256358735  | 0.15944047    | 0.00    | All stillbirth 75th         | -0.056138846  |
|      | 0.5688563    | 1.29          | 0.95    | 1.77                        |               |
| 14:  | 0.492000308  | 0.40667457    | 0.63    | Intra stillbirth 75th       | -0.305067208  |
|      | 1.2890678    | 1.64          | 0.74    | 3.63                        |               |
| 15:  | 0.166577408  | 0.25650317    | 0.00    | Antermortum 75th            | -0.336159558  |
|      | 0.6693144    | 1.18          | 0.71    | 1.95                        |               |
| 16:  | 0.291868389  | 0.14447928    | 0.00    | Pernatal death 75th         | 0.008694206   |
|      | 0.5750426    | 1.34          | 1.01    | 1.78                        |               |
|      |              | hr_all        | lag     | meas                        |               |
| 1:   | 1.11         | (0.91; 1.36)  | lag0    | Mean temperature            |               |
| 2:   | 0.99         | (0.61; 1.61)  | lag0    | Mean temperature            |               |
| 3:   | 1.35         | (1.00; 1.82)  | lag0    | Mean temperature            |               |
| 4:   | 1.17         | (0.98; 1.41)  | lag0    | Mean temperature            |               |

|                       | beta       | se     | i2      | model                  | low          |
|-----------------------|------------|--------|---------|------------------------|--------------|
| 5: 1.18 (0.94; 1.46)  |            |        |         |                        |              |
| 6: 1.06 (0.60; 1.86)  |            |        |         |                        |              |
| 7: 1.50 (1.06; 2.10)  |            |        |         |                        |              |
| 8: 1.23 (1.00; 1.50)  |            |        |         |                        |              |
| 9: 1.29 (1.01; 1.63)  |            |        |         |                        |              |
| 10: 1.13 (0.75; 1.70) |            |        |         |                        |              |
| 11: 1.50 (1.04; 2.18) |            |        |         |                        |              |
| 12: 1.32 (1.07; 1.64) |            |        |         |                        |              |
| 13: 1.29 (0.95; 1.77) |            |        |         |                        |              |
| 14: 1.64 (0.74; 3.63) |            |        |         |                        |              |
| 15: 1.18 (0.71; 1.95) |            |        |         |                        |              |
| 16: 1.34 (1.01; 1.78) |            |        |         |                        |              |
| high                  | or         | or_low | or_high |                        |              |
| 1: 0.256358735        | 0.15944047 | 0.00   |         | Stillbirth             | -0.056138846 |
| 0.5688563             | 1.29       | 0.95   | 1.77    |                        |              |
| 2: 0.492000308        | 0.40667457 | 0.63   |         | Intrapartum stillbirth | -0.305067208 |
| 1.2890678             | 1.64       | 0.74   | 3.63    |                        |              |
| 3: 0.166577408        | 0.25650317 | 0.00   |         | Antepartum stillbirth  | -0.336159558 |
| 0.6693144             | 1.18       | 0.71   | 1.95    |                        |              |
| 4: 0.291868389        | 0.14447928 | 0.00   |         | Perinatal death        | 0.008694206  |
| 0.5750426             | 1.34       | 1.01   | 1.78    |                        |              |
| 5: 0.034010500        | 0.10805934 | 0.00   |         | Stillbirth             | -0.177781916 |
| 0.2458029             | 1.03       | 0.84   | 1.28    |                        |              |
| 6: 0.095208287        | 0.17615539 | 0.24   |         | Intrapartum stillbirth | -0.250049933 |
| 0.4404665             | 1.10       | 0.78   | 1.55    |                        |              |
| 7: 0.008162232        | 0.16913477 | 0.00   |         | Antepartum stillbirth  | -0.323335831 |
| 0.3396603             | 1.01       | 0.72   | 1.40    |                        |              |
| 8: 0.050468343        | 0.09841252 | 0.00   |         | Perinatal death        | -0.142416655 |
| 0.2433533             | 1.05       | 0.87   | 1.28    |                        |              |
| 9: 0.047324827        | 0.11721829 | 0.00   |         | Stillbirth             | -0.182418809 |
| 0.2770685             | 1.05       | 0.83   | 1.32    |                        |              |
| 10: 0.122240189       | 0.19705369 | 0.29   |         | Intrapartum stillbirth | -0.263977944 |
| 0.5084583             | 1.13       | 0.77   | 1.66    |                        |              |
| 11: 0.022146925       | 0.18399448 | 0.00   |         | Antepartum stillbirth  | -0.338475622 |
| 0.3827695             | 1.02       | 0.71   | 1.47    |                        |              |
| 12: 0.067776946       | 0.10691744 | 0.00   |         | Perinatal death        | -0.141777392 |
| 0.2773313             | 1.07       | 0.87   | 1.32    |                        |              |
| 13: 0.039735970       | 0.15621058 | 0.00   |         | Stillbirth             | -0.266431141 |
| 0.3459031             | 1.04       | 0.77   | 1.41    |                        |              |
| 14: 0.124708042       | 0.29415281 | 0.49   |         | Intrapartum stillbirth | -0.451820868 |
| 0.7012370             | 1.13       | 0.64   | 2.02    |                        |              |
| 15: 0.056450113       | 0.22821954 | 0.00   |         | Antepartum stillbirth  | -0.390851962 |
| 0.5037522             | 1.06       | 0.68   | 1.65    |                        |              |
| 16: 0.086569152       | 0.14339456 | 0.00   |         | Perinatal death        | -0.194479013 |
| 0.3676173             | 1.09       | 0.82   | 1.44    |                        |              |
| 17: 0.127630901       | 0.15632689 | 0.00   |         | Stillbirth             | -0.178764174 |
| 0.4340260             | 1.14       | 0.84   | 1.54    |                        |              |
| 18: 0.248051567       | 0.30515969 | 0.45   |         | Intrapartum stillbirth | -0.350050438 |
| 0.8461536             | 1.28       | 0.70   | 2.33    |                        |              |
| 19: 0.083241940       | 0.24389409 | 0.00   |         | Antepartum stillbirth  | -0.394781686 |
| 0.5612656             | 1.09       | 0.67   | 1.75    |                        |              |
| 20: 0.168119283       | 0.14181000 | 0.00   |         | Perinatal death        | -0.109823210 |
| 0.4460618             | 1.18       | 0.90   | 1.56    |                        |              |

|     |             |            |      |      |                        |              |
|-----|-------------|------------|------|------|------------------------|--------------|
| 21: | 0.186028480 | 0.15801286 | 0.00 |      | Stillbirth             | -0.123671032 |
|     | 0.4957280   | 1.20       | 0.88 | 1.64 |                        |              |
| 22: | 0.387881493 | 0.35901056 | 0.58 |      | Intrapartum stillbirth | -0.315766268 |
|     | 1.0915293   | 1.47       | 0.73 | 2.98 |                        |              |
| 23: | 0.105858344 | 0.24989276 | 0.00 |      | Antepartum stillbirth  | -0.383922472 |
|     | 0.5956392   | 1.11       | 0.68 | 1.81 |                        |              |
| 24: | 0.222454970 | 0.14345668 | 0.00 |      | Perinatal death        | -0.058714965 |
|     | 0.5036249   | 1.25       | 0.94 | 1.65 |                        |              |
| 25: | 0.264241301 | 0.15754265 | 0.00 |      | Stillbirth             | -0.044536624 |
|     | 0.5730192   | 1.30       | 0.96 | 1.77 |                        |              |
| 26: | 0.516944812 | 0.40308425 | 0.63 |      | Intrapartum stillbirth | -0.273085795 |
|     | 1.3069754   | 1.68       | 0.76 | 3.69 |                        |              |
| 27: | 0.132612964 | 0.25319096 | 0.00 |      | Antepartum stillbirth  | -0.363632201 |
|     | 0.6288581   | 1.14       | 0.70 | 1.88 |                        |              |
| 28: | 0.296579356 | 0.14235718 | 0.00 |      | Perinatal death        | 0.017564406  |
|     | 0.5755943   | 1.35       | 1.02 | 1.78 |                        |              |
| 29: | 0.229055972 | 0.15987010 | 0.00 |      | Stillbirth             | -0.084283661 |
|     | 0.5423956   | 1.26       | 0.92 | 1.72 |                        |              |
| 30: | 0.437366641 | 0.30586458 | 0.46 |      | Intrapartum stillbirth | -0.162116924 |
|     | 1.0368502   | 1.55       | 0.85 | 2.82 |                        |              |
| 31: | 0.126939706 | 0.25045326 | 0.00 |      | Antepartum stillbirth  | -0.363939667 |
|     | 0.6178191   | 1.14       | 0.69 | 1.85 |                        |              |
| 32: | 0.255341487 | 0.14503391 | 0.00 |      | Perinatal death        | -0.028919753 |
|     | 0.5396027   | 1.29       | 0.97 | 1.72 |                        |              |
| 33: | 0.253054119 | 0.15965226 | 0.00 |      | Stillbirth             | -0.059858568 |
|     | 0.5659668   | 1.29       | 0.94 | 1.76 |                        |              |
| 34: | 0.508669640 | 0.36251729 | 0.58 |      | Intrapartum stillbirth | -0.201851194 |
|     | 1.2191905   | 1.66       | 0.82 | 3.38 |                        |              |
| 35: | 0.152643273 | 0.25363169 | 0.00 |      | Antepartum stillbirth  | -0.344465700 |
|     | 0.6497522   | 1.16       | 0.71 | 1.92 |                        |              |
| 36: | 0.279918265 | 0.14485827 | 0.00 |      | Perinatal death        | -0.003998724 |
|     | 0.5638353   | 1.32       | 1.00 | 1.76 |                        |              |

|      | beta   | se           | i2      | model       | low |
|------|--------|--------------|---------|-------------|-----|
| high | or     | or_low       | or_high |             |     |
|      | hr_all |              |         | sens        |     |
| 1:   | 1.29   | (0.95; 1.77) |         | Main model  |     |
| 2:   | 1.64   | (0.74; 3.63) |         | Main model  |     |
| 3:   | 1.18   | (0.71; 1.95) |         | Main model  |     |
| 4:   | 1.34   | (1.01; 1.78) |         | Main model  |     |
| 5:   | 1.03   | (0.84; 1.28) |         | 1 knot 50th |     |
| 6:   | 1.10   | (0.78; 1.55) |         | 1 knot 50th |     |
| 7:   | 1.01   | (0.72; 1.40) |         | 1 knot 50th |     |
| 8:   | 1.05   | (0.87; 1.28) |         | 1 knot 50th |     |
| 9:   | 1.05   | (0.83; 1.32) |         | 1 knot 75th |     |
| 10:  | 1.13   | (0.77; 1.66) |         | 1 knot 75th |     |
| 11:  | 1.02   | (0.71; 1.47) |         | 1 knot 75th |     |
| 12:  | 1.07   | (0.87; 1.32) |         | 1 knot 75th |     |
| 13:  | 1.04   | (0.77; 1.41) | 2 knot  | 25 and 50th |     |
| 14:  | 1.13   | (0.64; 2.02) | 2 knot  | 25 and 50th |     |
| 15:  | 1.06   | (0.68; 1.65) | 2 knot  | 25 and 50th |     |
| 16:  | 1.09   | (0.82; 1.44) | 2 knot  | 25 and 50th |     |
| 17:  | 1.14   | (0.84; 1.54) | 2 knot  | 50 and 75th |     |
| 18:  | 1.28   | (0.70; 2.33) | 2 knot  | 50 and 75th |     |
| 19:  | 1.09   | (0.67; 1.75) | 2 knot  | 50 and 75th |     |

|      |              |               |                         |                        |                   |
|------|--------------|---------------|-------------------------|------------------------|-------------------|
| 20:  | 1.18         | (0.90; 1.56)  | 2 knot 50 and 75th      |                        |                   |
| 21:  | 1.20         | (0.88; 1.64)  | 2 knot 50 and 90th      |                        |                   |
| 22:  | 1.47         | (0.73; 2.98)  | 2 knot 50 and 90th      |                        |                   |
| 23:  | 1.11         | (0.68; 1.81)  | 2 knot 50 and 90th      |                        |                   |
| 24:  | 1.25         | (0.94; 1.65)  | 2 knot 50 and 90th      |                        |                   |
| 25:  | 1.30         | (0.96; 1.77)  | 2 knot 75 and 90th      |                        |                   |
| 26:  | 1.68         | (0.76; 3.69)  | 2 knot 75 and 90th      |                        |                   |
| 27:  | 1.14         | (0.70; 1.88)  | 2 knot 75 and 90th      |                        |                   |
| 28:  | 1.35         | (1.02; 1.78)  | 2 knot 75 and 90th      |                        |                   |
| 29:  | 1.26         | (0.92; 1.72)  | 3 knot 25, 50 and 75th  |                        |                   |
| 30:  | 1.55         | (0.85; 2.82)  | 3 knot 25, 50 and 75th  |                        |                   |
| 31:  | 1.14         | (0.69; 1.85)  | 3 knot 25, 50 and 75th  |                        |                   |
| 32:  | 1.29         | (0.97; 1.72)  | 3 knot 25, 50 and 75th  |                        |                   |
| 33:  | 1.29         | (0.94; 1.76)  | 3 knot 10, 50 and 90th  |                        |                   |
| 34:  | 1.66         | (0.82; 3.38)  | 3 knot 10, 50 and 90th  |                        |                   |
| 35:  | 1.16         | (0.71; 1.92)  | 3 knot 10, 50 and 90th  |                        |                   |
| 36:  | 1.32         | (1.00; 1.76)  | 3 knot 10, 50 and 90th  |                        |                   |
|      |              | hr_all        | sens                    |                        |                   |
|      | beta         | se            | i2                      | model                  | cen               |
| low  | high         | or            | or_low                  | or_high                |                   |
| 1:   | 0.25635874   | 0.1594405     | 0.00                    |                        | Stillbirth 75th   |
|      | -0.056138846 | 0.5688563     | 1.29                    | 0.95                   | 1.77              |
| 2:   | 0.49200031   | 0.4066746     | 0.63                    | Intrapartum stillbirth | 75th              |
|      | -0.305067208 | 1.2890678     | 1.64                    | 0.74                   | 3.63              |
| 3:   | 0.16657741   | 0.2565032     | 0.00                    | Antepartum stillbirth  | 75th              |
|      | -0.336159558 | 0.6693144     | 1.18                    | 0.71                   | 1.95              |
| 4:   | 0.29186839   | 0.1444793     | 0.00                    | Perinatal death        | 75th              |
|      | 0.008694206  | 0.5750426     | 1.34                    | 1.01                   | 1.78              |
| 5:   | 0.04140698   | 0.3842313     | 0.57                    |                        | Stillbirth 75th   |
|      | -0.711672607 | 0.7944866     | 1.04                    | 0.49                   | 2.21              |
| 6:   | 0.50730666   | 0.9577834     | 0.66                    | Intrapartum stillbirth | 75th              |
|      | -1.369914300 | 2.3845276     | 1.66                    | 0.25                   | 10.85             |
| 7:   | -0.03046354  | 0.4570420     | 0.36                    | Antepartum stillbirth  | 75th              |
|      | -0.926249360 | 0.8653223     | 0.97                    | 0.40                   | 2.38              |
| 8:   | 0.27476082   | 0.2333967     | 0.03                    | Perinatal death        | 75th              |
|      | -0.182688335 | 0.7322100     | 1.32                    | 0.83                   | 2.08              |
|      |              | hr_all        |                         | exp                    |                   |
| 1:   | 1.29         | (0.95; 1.77)  |                         | Main model             |                   |
| 2:   | 1.64         | (0.74; 3.63)  |                         | Main model             |                   |
| 3:   | 1.18         | (0.71; 1.95)  |                         | Main model             |                   |
| 4:   | 1.34         | (1.01; 1.78)  |                         | Main model             |                   |
| 5:   | 1.04         | (0.49; 2.21)  | Without referral births |                        |                   |
| 6:   | 1.66         | (0.25; 10.85) | Without referral births |                        |                   |
| 7:   | 0.97         | (0.40; 2.38)  | Without referral births |                        |                   |
| 8:   | 1.32         | (0.83; 2.08)  | Without referral births |                        |                   |
|      | beta         | se            | i2                      | model                  | low               |
| high | or           | or_low        | or_high                 | hr_all                 |                   |
| 1:   | 0.2563587    | 0.1594405     | 0.00                    | Stillbirth             | -0.056138846      |
|      | 0.5688563    | 1.29          | 0.95                    | 1.77                   | 1.29 (0.95; 1.77) |
| 2:   | 0.4920003    | 0.4066746     | 0.63                    | Intrapartum stillbirth | -0.305067208      |
|      | 1.2890678    | 1.64          | 0.74                    | 3.63                   | 1.64 (0.74; 3.63) |
| 3:   | 0.1665774    | 0.2565032     | 0.00                    | Antepartum stillbirth  | -0.336159558      |
|      | 0.6693144    | 1.18          | 0.71                    | 1.95                   | 1.18 (0.71; 1.95) |
| 4:   | 0.2918684    | 0.1444793     | 0.00                    | Perinatal death        | 0.008694206       |

|                     |                         |        |                   |                |              |                        |              |
|---------------------|-------------------------|--------|-------------------|----------------|--------------|------------------------|--------------|
| 0.5750426           | 1.34                    | 1.01   | 1.78              | 1.34           | (1.01; 1.78) |                        |              |
| 5: 0.2982135        | 0.1828654               | 0.11   |                   |                |              | Stillbirth             | -0.060196008 |
| 0.6566230           | 1.35                    | 0.94   | 1.93              | 1.35           | (0.94; 1.93) |                        |              |
| 6: 0.5089230        | 0.4750557               | 0.66   |                   |                |              | Intrapartum stillbirth | -0.422169009 |
| 1.4400150           | 1.66                    | 0.66   | 4.22              | 1.66           | (0.66; 4.22) |                        |              |
| 7: 0.3011163        | 0.2909557               | 0.23   |                   |                |              | Antepartum stillbirth  | -0.269146374 |
| 0.8713789           | 1.35                    | 0.76   | 2.39              | 1.35           | (0.76; 2.39) |                        |              |
| 8: 0.7455280        | 0.4285438               | 0.00   |                   |                |              | <NA>                   | -0.094402486 |
| 1.5854584           | 2.11                    | 0.91   | 4.88              | 2.11           | (0.91; 4.88) |                        |              |
| 9: 0.3881615        | 0.1660860               | 0.09   |                   |                |              | Perinatal death        | 0.062638841  |
| 0.7136841           | 1.47                    | 1.06   | 2.04              | 1.47           | (1.06; 2.04) |                        |              |
|                     | exp                     |        | meas              |                |              |                        |              |
| 1: Mean temperature | Not adj.                | RH     |                   |                |              |                        |              |
| 2: Mean temperature | Not adj.                | RH     |                   |                |              |                        |              |
| 3: Mean temperature | Not adj.                | RH     |                   |                |              |                        |              |
| 4: Mean temperature | Not adj.                | RH     |                   |                |              |                        |              |
| 5: Mean temperature | adj.                    | RH     |                   |                |              |                        |              |
| 6: Mean temperature | adj.                    | RH     |                   |                |              |                        |              |
| 7: Mean temperature | adj.                    | RH     |                   |                |              |                        |              |
| 8: Mean temperature | adj.                    | RH     |                   |                |              |                        |              |
| 9: Mean temperature | adj.                    | RH     |                   |                |              |                        |              |
|                     | exp                     | cen    | resolution        | All stillbirth |              | Antermortum            | Intra        |
|                     | stillbirth              |        | Pernatal death    |                |              |                        |              |
| 1: tmean 75th       | 28x28km                 | 1.28   | (0.92; 1.79)      | 1.19           | (0.71; 2.00) | 1.56                   |              |
| (0.74; 3.30)        |                         | 1.24   | (0.92; 1.69)      |                |              |                        |              |
| 2: tmean 75th       | 9x9km                   | 1.29   | (0.95; 1.77)      | 1.18           | (0.71; 1.95) | 1.64                   |              |
| (0.74; 3.63)        |                         | 1.34   | (1.01; 1.78)      |                |              |                        |              |
| 3: tmax 75th        | 28x28km                 | 1.32   | (0.89; 1.97)      | 1.12           | (0.62; 2.03) | 2.01                   |              |
| (0.78; 5.20)        |                         | 1.33   | (0.93; 1.88)      |                |              |                        |              |
| 4: tmax 75th        | 9x9km                   | 1.22   | (0.89; 1.68)      | 1.12           | (0.69; 1.82) | 1.33                   |              |
| (0.81; 2.20)        |                         | 1.24   | (0.93; 1.66)      |                |              |                        |              |
| 5: tmin 75th        | 28x28km                 | 1.31   | (0.87; 1.98)      | 1.14           | (0.61; 2.12) | 1.49                   |              |
| (0.85; 2.62)        |                         | 1.16   | (0.80; 1.68)      |                |              |                        |              |
| 6: tmin 75th        | 9x9km                   | 1.30   | (0.88; 1.94)      | 0.91           | (0.50; 1.68) | 1.74                   |              |
| (1.04; 2.92)        |                         | 1.30   | (0.90; 1.88)      |                |              |                        |              |
|                     | model                   |        | out country       |                |              | Mean                   |              |
| Min                 |                         | Max    |                   |                |              |                        |              |
| 1: Cox              | Perinatal death         | First  | 0.87 (0.55; 1.35) | 0.81           |              |                        |              |
| (0.56; 1.17)        | 1.05 (0.66; 1.67)       |        |                   |                |              |                        |              |
| 2: Cox              | Perinatal death         | Second | 1.11 (0.76; 1.60) | 1.15           |              |                        |              |
| (0.86; 1.53)        | 1.14 (0.64; 2.04)       |        |                   |                |              |                        |              |
| 3: Cox              | Perinatal death         | Third  | 2.03 (1.67; 2.48) | 1.48           |              |                        |              |
| (0.86; 2.53)        | 1.61 (0.92; 2.80)       |        |                   |                |              |                        |              |
| 4: Cox              | Intrapartum stillbirths | First  | 0.63 (0.34; 1.16) | 0.90           |              |                        |              |
| (0.42; 1.92)        | 0.80 (0.36; 1.80)       |        |                   |                |              |                        |              |
| 5: Cox              | Intrapartum stillbirths | Second | 0.95 (0.44; 2.04) | 1.29           |              |                        |              |
| (0.95; 1.75)        | 1.02 (0.37; 2.77)       |        |                   |                |              |                        |              |
| 6: Cox              | Intrapartum stillbirths | Third  | 1.52 (0.93; 2.48) | 1.23           |              |                        |              |
| (0.59; 2.55)        | 1.25 (0.66; 2.36)       |        |                   |                |              |                        |              |
| 7: Cox              | Antepartum stillbirths  | First  | 1.04 (0.72; 1.51) | 0.59           |              |                        |              |
| (0.45; 0.77)        | 1.21 (0.84; 1.75)       |        |                   |                |              |                        |              |
| 8: Cox              | Antepartum stillbirths  | Second | 0.96 (0.74; 1.25) | 0.95           |              |                        |              |
| (0.72; 1.26)        | 1.00 (0.73; 1.38)       |        |                   |                |              |                        |              |
| 9: Cox              | Antepartum stillbirths  | Third  | 2.22 (1.85; 2.66) | 1.86           |              |                        |              |

|                                                                   | beta | se | i2 | model | low |
|-------------------------------------------------------------------|------|----|----|-------|-----|
| (1.16; 2.97) 1.88 (1.05; 3.34)                                    |      |    |    |       |     |
| 10: Cox Stillbirth First 0.79 (0.50; 1.25) 0.80                   |      |    |    |       |     |
| (0.52; 1.22) 1.01 (0.59; 1.76)                                    |      |    |    |       |     |
| 11: Cox Stillbirth Second 1.04 (0.65; 1.65) 1.10                  |      |    |    |       |     |
| (0.80; 1.51) 1.11 (0.57; 2.14)                                    |      |    |    |       |     |
| 12: Cox Stillbirth Third 2.06 (1.70; 2.50) 1.50                   |      |    |    |       |     |
| (0.84; 2.66) 1.58 (0.94; 2.66)                                    |      |    |    |       |     |
| high                                                              | beta | se | i2 | model | low |
| 1: 0.38528751 0.2345277 0.28 Stillbirth -0.07437837               |      |    |    |       |     |
| 0.8449534 1.47 0.93                                               |      |    |    |       |     |
| 2: 0.76217091 0.5847725 0.58 Intrapartum stillbirth -0.38396216   |      |    |    |       |     |
| 1.9083040 2.14 0.68                                               |      |    |    |       |     |
| 3: -0.12881448 0.3949203 0.00 Antepartum stillbirth -0.90284412   |      |    |    |       |     |
| 0.6452152 0.88 0.41                                               |      |    |    |       |     |
| 4: 0.43154551 0.2130242 0.00 Perinatal death 0.01402568           |      |    |    |       |     |
| 0.8490653 1.54 1.01                                               |      |    |    |       |     |
| 5: 0.15147386 0.2366900 0.00 Stillbirth -0.31242998               |      |    |    |       |     |
| 0.6153777 1.16 0.73                                               |      |    |    |       |     |
| 6: -0.10743988 0.3405917 0.12 Intrapartum stillbirth -0.77498731  |      |    |    |       |     |
| 0.5601075 0.90 0.46                                               |      |    |    |       |     |
| 7: 0.48194745 0.3839801 0.00 Antepartum stillbirth -0.27063964    |      |    |    |       |     |
| 1.2345345 1.62 0.76                                               |      |    |    |       |     |
| 8: 0.19848126 0.2109552 0.00 Perinatal death -0.21498327          |      |    |    |       |     |
| 0.6119458 1.22 0.81                                               |      |    |    |       |     |
| 9: -0.02009406 0.3302998 0.21 Stillbirth -0.66746985              |      |    |    |       |     |
| 0.6272817 0.98 0.51                                               |      |    |    |       |     |
| 10: -0.04686585 0.7593410 0.55 Intrapartum stillbirth -1.53514681 |      |    |    |       |     |
| 1.4414151 0.95 0.22                                               |      |    |    |       |     |
| 11: -0.11242254 1.1171025 0.67 Antepartum stillbirth -2.30190314  |      |    |    |       |     |
| 2.0770581 0.89 0.10                                               |      |    |    |       |     |
| 12: -0.04982823 0.2801217 0.00 Perinatal death -0.59885677        |      |    |    |       |     |
| 0.4992003 0.95 0.55                                               |      |    |    |       |     |
| 13: 0.35035074 0.2050772 0.00 Stillbirth -0.05159310              |      |    |    |       |     |
| 0.7522946 1.42 0.95                                               |      |    |    |       |     |
| 14: 0.44696829 0.3463714 0.55 Intrapartum stillbirth -0.23190719  |      |    |    |       |     |
| 1.1258438 1.56 0.79                                               |      |    |    |       |     |
| 15: 0.23787492 0.3231968 0.00 Antepartum stillbirth -0.39557907   |      |    |    |       |     |
| 0.8713289 1.27 0.67                                               |      |    |    |       |     |
| 16: 0.32599941 0.1898788 0.00 Perinatal death -0.04615615         |      |    |    |       |     |
| 0.6981550 1.39 0.95                                               |      |    |    |       |     |
| 17: 0.44845289 0.3052731 0.00 Stillbirth -0.14987134              |      |    |    |       |     |
| 1.0467771 1.57 0.86                                               |      |    |    |       |     |
| 18: 0.55044734 0.4865173 0.31 Intrapartum stillbirth -0.40310912  |      |    |    |       |     |
| 1.5040038 1.73 0.67                                               |      |    |    |       |     |
| 19: 0.30601169 0.4571370 0.00 Antepartum stillbirth -0.58996046   |      |    |    |       |     |
| 1.2019838 1.36 0.55                                               |      |    |    |       |     |
| 20: 0.36940843 0.2784450 0.00 Perinatal death -0.17633369         |      |    |    |       |     |
| 0.9151505 1.45 0.84                                               |      |    |    |       |     |
| 21: 0.15902720 0.2204745 0.00 Stillbirth -0.27309493              |      |    |    |       |     |
| 0.5911493 1.17 0.76                                               |      |    |    |       |     |
| 22: 0.35613850 0.2971562 0.00 Intrapartum stillbirth -0.22627702  |      |    |    |       |     |
| 0.9385540 1.43 0.80                                               |      |    |    |       |     |
| 23: 0.05454125 0.3752460 0.00 Antepartum stillbirth -0.68092731   |      |    |    |       |     |



|             |                     |            |      |                        |              |
|-------------|---------------------|------------|------|------------------------|--------------|
| 0.7900098   |                     | 1.06       | 0.51 |                        |              |
| 24:         | 0.12671785          | 0.1992934  | 0.00 | Perinatal death        | -0.26389000  |
| 0.5173257   |                     | 1.14       | 0.77 |                        |              |
| 25:         | 0.27426974          | 0.1848649  | 0.00 | Stillbirth             | -0.08805885  |
| 0.6365983   |                     | 1.32       | 0.92 |                        |              |
| 26:         | 0.25838727          | 0.3860722  | 0.47 | Intrapartum stillbirth | -0.49830033  |
| 1.0150749   |                     | 1.29       | 0.61 |                        |              |
| 27:         | 0.27154049          | 0.4306500  | 0.51 | Antepartum stillbirth  | -0.57251795  |
| 1.1155989   |                     | 1.31       | 0.56 |                        |              |
| 28:         | 0.22907223          | 0.1687692  | 0.00 | Perinatal death        | -0.10170934  |
| 0.5598538   |                     | 1.26       | 0.90 |                        |              |
| 29:         | -0.05880619         | 0.5141086  | 0.08 | Stillbirth             | -1.06644048  |
| 0.9488281   |                     | 0.94       | 0.34 |                        |              |
| 30:         | 0.13338699          | 0.7139729  | 0.48 | Intrapartum stillbirth | -1.26597414  |
| 1.5327481   |                     | 1.14       | 0.28 |                        |              |
| 31:         | -0.91192462         | 1.0310109  | 0.21 | Antepartum stillbirth  | -2.93266884  |
| 1.1088196   |                     | 0.40       | 0.05 |                        |              |
| 32:         | -0.01221996         | 0.4947381  | 0.13 | Perinatal death        | -0.98188877  |
| 0.9574488   |                     | 0.99       | 0.37 |                        |              |
| 33:         | 0.10757374          | 0.2187639  | 0.00 | Stillbirth             | -0.32119568  |
| 0.5363432   |                     | 1.11       | 0.73 |                        |              |
| 34:         | 0.31017982          | 0.2865530  | 0.00 | Intrapartum stillbirth | -0.25145373  |
| 0.8718134   |                     | 1.36       | 0.78 |                        |              |
| 35:         | -0.12481928         | 0.3872471  | 0.00 | Antepartum stillbirth  | -0.88380968  |
| 0.6341711   |                     | 0.88       | 0.41 |                        |              |
| 36:         | 0.11085195          | 0.1988185  | 0.00 | Perinatal death        | -0.27882508  |
| 0.5005290   |                     | 1.12       | 0.76 |                        |              |
| 37:         | 0.32876594          | 0.2724860  | 0.00 | Stillbirth             | -0.20529689  |
| 0.8628288   |                     | 1.39       | 0.81 |                        |              |
| 38:         | 0.79253124          | 0.8748433  | 0.64 | Intrapartum stillbirth | -0.92213003  |
| 2.5071925   |                     | 2.21       | 0.40 |                        |              |
| 39:         | 0.19563408          | 0.4044370  | 0.00 | Antepartum stillbirth  | -0.59704783  |
| 0.9883160   |                     | 1.22       | 0.55 |                        |              |
| 40:         | 0.36048746          | 0.2514400  | 0.00 | Perinatal death        | -0.13232592  |
| 0.8533008   |                     | 1.43       | 0.88 |                        |              |
| 41:         | 0.24998296          | 0.1863416  | 0.00 | Stillbirth             | -0.11523980  |
| 0.6152057   |                     | 1.28       | 0.89 |                        |              |
| 42:         | 0.31786609          | 0.3631581  | 0.51 | Intrapartum stillbirth | -0.39391066  |
| 1.0296428   |                     | 1.37       | 0.67 |                        |              |
| 43:         | 0.22981912          | 0.3280079  | 0.30 | Antepartum stillbirth  | -0.41306457  |
| 0.8727028   |                     | 1.26       | 0.66 |                        |              |
| 44:         | 0.20512214          | 0.1675777  | 0.00 | Perinatal death        | -0.12332421  |
| 0.5335685   |                     | 1.23       | 0.88 |                        |              |
| 45:         | 2.99941809          | 2.2207075  | 0.00 | Stillbirth             | -1.35308864  |
| 7.3519248   |                     | 20.07      | 0.26 |                        |              |
| 46:         | 34.99858608         | 53.3375875 | 0.46 | Intrapartum stillbirth | -69.54116446 |
| 139.5383366 | 1583772542650948.75 | 0.00       |      |                        |              |
| 47:         | 3.38504639          | 7.4885950  | 0.00 | Antepartum stillbirth  | -11.29233019 |
| 18.0624230  |                     | 29.52      | 0.00 |                        |              |
| 48:         | 1.82389933          | 1.4666984  | 0.00 | Perinatal death        | -1.05077662  |
| 4.6985753   |                     | 6.20       | 0.35 |                        |              |
| 49:         | 0.25460061          | 0.1782384  | 0.00 | Stillbirth             | -0.09474019  |
| 0.6039414   |                     | 1.29       | 0.91 |                        |              |
| 50:         | 0.59024497          | 0.5111892  | 0.68 | Intrapartum stillbirth | -0.41166749  |

|           |              |            |        |                        |              |
|-----------|--------------|------------|--------|------------------------|--------------|
| 1.5921574 |              | 1.80       | 0.66   |                        |              |
| 51:       | 0.15230862   | 0.2702802  | 0.00   | Antepartum stillbirth  | -0.37743084  |
|           | 0.6820481    | 1.16       | 0.69   |                        |              |
| 52:       | 0.21336121   | 0.1601387  | 0.00   | Perinatal death        | -0.10050485  |
|           | 0.5272273    | 1.24       | 0.90   |                        |              |
| 53:       | -0.64357673  | 1.5010002  | 0.36   | Stillbirth             | -3.58548311  |
|           | 2.2983296    | 0.53       | 0.03   |                        |              |
| 54:       | -1.08630062  | 3.0621718  | 0.53   | Intrapartum stillbirth | -7.08804703  |
|           | 4.9154458    | 0.34       | 0.00   |                        |              |
| 55:       | -13.06200000 | 18.5760000 | NA     | Antepartum stillbirth  | -49.47029098 |
|           | 23.3462910   | 0.00       | 0.00   |                        |              |
| 56:       | 0.01020290   | 0.7373332  | 0.00   | Perinatal death        | -1.43494368  |
|           | 1.4553495    | 1.01       | 0.24   |                        |              |
| 57:       | 0.18513393   | 0.1807993  | 0.00   | Stillbirth             | -0.16922618  |
|           | 0.5394940    | 1.20       | 0.84   |                        |              |
| 58:       | 0.49232522   | 0.4777862  | 0.65   | Intrapartum stillbirth | -0.44411859  |
|           | 1.4287690    | 1.64       | 0.64   |                        |              |
| 59:       | 0.08776782   | 0.2815622  | 0.00   | Antepartum stillbirth  | -0.46408393  |
|           | 0.6396196    | 1.09       | 0.63   |                        |              |
| 60:       | 0.18507037   | 0.1634366  | 0.00   | Perinatal death        | -0.13525953  |
|           | 0.5054003    | 1.20       | 0.87   |                        |              |
| 61:       | 0.54911219   | 1.0173226  | 0.36   | Stillbirth             | -1.44480342  |
|           | 2.5430278    | 1.73       | 0.24   |                        |              |
| 62:       | 0.44764539   | 0.9047141  | 0.00   | Intrapartum stillbirth | -1.32556159  |
|           | 2.2208524    | 1.56       | 0.27   |                        |              |
| 63:       | 4.28821362   | 5.0121627  | 0.23   | Antepartum stillbirth  | -5.53544473  |
|           | 14.1118720   | 72.84      | 0.00   |                        |              |
| 64:       | 0.36044746   | 0.9675032  | 0.36   | Perinatal death        | -1.53582393  |
|           | 2.2567189    | 1.43       | 0.22   |                        |              |
| 65:       | 0.16203649   | 0.1844416  | 0.00   | Stillbirth             | -0.19946249  |
|           | 0.5235355    | 1.18       | 0.82   |                        |              |
| 66:       | 0.37392277   | 0.3657643  | 0.54   | Intrapartum stillbirth | -0.34296211  |
|           | 1.0908076    | 1.45       | 0.71   |                        |              |
| 67:       | 0.02883586   | 0.3096061  | 0.55   | Antepartum stillbirth  | -0.57798087  |
|           | 0.6356526    | 1.03       | 0.56   |                        |              |
| 68:       | 0.13439947   | 0.1678084  | 0.00   | Perinatal death        | -0.19449888  |
|           | 0.4632978    | 1.14       | 0.82   |                        |              |
| 69:       | 0.61154478   | 0.4454890  | 0.00   | Stillbirth             | -0.26159758  |
|           | 1.4846871    | 1.84       | 0.77   |                        |              |
| 70:       | 0.23009840   | 0.8080689  | 0.00   | Intrapartum stillbirth | -1.35368755  |
|           | 1.8138844    | 1.26       | 0.26   |                        |              |
| 71:       | 0.67811906   | 0.9567516  | 0.31   | Antepartum stillbirth  | -1.19707964  |
|           | 2.5533178    | 1.97       | 0.30   |                        |              |
| 72:       | 0.61610472   | 0.4071655  | 0.00   | Perinatal death        | -0.18192501  |
|           | 1.4141345    | 1.85       | 0.83   |                        |              |
|           | beta         | se         | i2     | model                  | low          |
| high      |              | or         | or_low |                        | or_high      |
| 1:        |              |            |        |                        | 2.33         |
| 2:        |              |            |        |                        | 6.74         |
| 3:        |              |            |        |                        | 1.91         |
| 4:        |              |            |        |                        | 2.34         |
| 5:        |              |            |        |                        | 1.85         |
| 6:        |              |            |        |                        | 1.75         |

|     |                                                                  |
|-----|------------------------------------------------------------------|
| 7:  | 3.44                                                             |
| 8:  | 1.84                                                             |
| 9:  | 1.87                                                             |
| 10: | 4.23                                                             |
| 11: | 7.98                                                             |
| 12: | 1.65                                                             |
| 13: | 2.12                                                             |
| 14: | 3.08                                                             |
| 15: | 2.39                                                             |
| 16: | 2.01                                                             |
| 17: | 2.85                                                             |
| 18: | 4.50                                                             |
| 19: | 3.33                                                             |
| 20: | 2.50                                                             |
| 21: | 1.81                                                             |
| 22: | 2.56                                                             |
| 23: | 2.20                                                             |
| 24: | 1.68                                                             |
| 25: | 1.89                                                             |
| 26: | 2.76                                                             |
| 27: | 3.05                                                             |
| 28: | 1.75                                                             |
| 29: | 2.58                                                             |
| 30: | 4.63                                                             |
| 31: | 3.03                                                             |
| 32: | 2.61                                                             |
| 33: | 1.71                                                             |
| 34: | 2.39                                                             |
| 35: | 1.89                                                             |
| 36: | 1.65                                                             |
| 37: | 2.37                                                             |
| 38: | 12.27                                                            |
| 39: | 2.69                                                             |
| 40: | 2.35                                                             |
| 41: | 1.85                                                             |
| 42: | 2.80                                                             |
| 43: | 2.39                                                             |
| 44: | 1.71                                                             |
| 45: | 1559.19                                                          |
| 46: | 3987765493489437445693253750246548751757004373365443988029440.00 |
| 47: | 69889289.81                                                      |
| 48: | 109.79                                                           |
| 49: | 1.83                                                             |
| 50: | 4.91                                                             |
| 51: | 1.98                                                             |
| 52: | 1.69                                                             |
| 53: | 9.96                                                             |
| 54: | 136.38                                                           |
| 55: | 13777338984.60                                                   |
| 56: | 4.29                                                             |
| 57: | 1.72                                                             |
| 58: | 4.17                                                             |
| 59: | 1.90                                                             |
| 60: | 1.66                                                             |

|     |            |
|-----|------------|
| 61: | 12.72      |
| 62: | 9.22       |
| 63: | 1344956.15 |
| 64: | 9.55       |
| 65: | 1.69       |
| 66: | 2.98       |
| 67: | 1.89       |
| 68: | 1.59       |
| 69: | 4.41       |
| 70: | 6.13       |
| 71: | 12.85      |
| 72: | 4.11       |
|     | or_high    |

| hr_all            | eff |             |
|-------------------|-----|-------------|
| 1:                |     |             |
| 1.47 (0.93; 2.33) |     | Girl        |
| 2:                |     |             |
| 2.14 (0.68; 6.74) |     | Girl        |
| 3:                |     |             |
| 0.88 (0.41; 1.91) |     | Girl        |
| 4:                |     |             |
| 1.54 (1.01; 2.34) |     | Girl        |
| 5:                |     |             |
| 1.16 (0.73; 1.85) |     | Boy         |
| 6:                |     |             |
| 0.90 (0.46; 1.75) |     | Boy         |
| 7:                |     |             |
| 1.62 (0.76; 3.44) |     | Boy         |
| 8:                |     |             |
| 1.22 (0.81; 1.84) |     | Boy         |
| 9:                |     |             |
| 0.98 (0.51; 1.87) |     | 1st         |
| 10:               |     |             |
| 0.95 (0.22; 4.23) |     | 1st         |
| 11:               |     |             |
| 0.89 (0.10; 7.98) |     | 1st         |
| 12:               |     |             |
| 0.95 (0.55; 1.65) |     | 1st         |
| 13:               |     |             |
| 1.42 (0.95; 2.12) |     | 2nd or more |
| 14:               |     |             |
| 1.56 (0.79; 3.08) |     | 2nd or more |
| 15:               |     |             |
| 1.27 (0.67; 2.39) |     | 2nd or more |
| 16:               |     |             |
| 1.39 (0.95; 2.01) |     | 2nd or more |
| 17:               |     |             |
| 1.57 (0.86; 2.85) |     | Preterm     |
| 18:               |     |             |
| 1.73 (0.67; 4.50) |     | Preterm     |
| 19:               |     |             |
| 1.36 (0.55; 3.33) |     | Preterm     |
| 20:               |     |             |

1.45 (0.84; 2.50) Preterm  
 21:  
 1.17 (0.76; 1.81) To term  
 22:  
 1.43 (0.80; 2.56) To term  
 23:  
 1.06 (0.51; 2.20) To term  
 24:  
 1.14 (0.77; 1.68) To term  
 25:  
 1.32 (0.92; 1.89) <35 years  
 26:  
 1.29 (0.61; 2.76) <35 years  
 27:  
 1.31 (0.56; 3.05) <35 years  
 28:  
 1.26 (0.90; 1.75) <35 years  
 29:  
 0.94 (0.34; 2.58) >=35 years  
 30:  
 1.14 (0.28; 4.63) >=35 years  
 31:  
 0.40 (0.05; 3.03) >=35 years  
 32:  
 0.99 (0.37; 2.61) >=35 years  
 33:  
 1.11 (0.73; 1.71) <2500 gr  
 34:  
 1.36 (0.78; 2.39) <2500 gr  
 35:  
 0.88 (0.41; 1.89) <2500 gr  
 36:  
 1.12 (0.76; 1.65) <2500 gr  
 37:  
 1.39 (0.81; 2.37) >= 2500 gr  
 38:  
 2.21 (0.40; 12.27) >= 2500 gr  
 39:  
 1.22 (0.55; 2.69) >= 2500 gr  
 40:  
 1.43 (0.88; 2.35) >= 2500 gr  
 41:  
 1.28 (0.89; 1.85) Negative  
 42:  
 1.37 (0.67; 2.80) Negative  
 43:  
 1.26 (0.66; 2.39) Negative  
 44:  
 1.23 (0.88; 1.71) Negative  
 45:  
 20.07 (0.26; 1559.19) Positive  
 46: 1583772542650948.75 (0.00;  
 3987765493489437445693253750246548751757004373365443988029440.00)  
 Positive

|     |                             |            |
|-----|-----------------------------|------------|
| 47: | 29.52 (0.00; 69889289.81)   | Positive   |
| 48: | 6.20 (0.35; 109.79)         | Positive   |
| 49: | 1.29 (0.91; 1.83)           | Normal     |
| 50: | 1.80 (0.66; 4.91)           | Normal     |
| 51: | 1.16 (0.69; 1.98)           | Normal     |
| 52: | 1.24 (0.90; 1.69)           | Normal     |
| 53: | 0.53 (0.03; 9.96)           | Prolongued |
| 54: | 0.34 (0.00; 136.38)         | Prolongued |
| 55: | 0.00 (0.00; 13777338984.60) | Prolongued |
| 56: | 1.01 (0.24; 4.29)           | Prolongued |
| 57: | 1.20 (0.84; 1.72)           | No         |
| 58: | 1.64 (0.64; 4.17)           | No         |
| 59: | 1.09 (0.63; 1.90)           | No         |
| 60: | 1.20 (0.87; 1.66)           | No         |
| 61: | 1.73 (0.24; 12.72)          | Yes        |
| 62: | 1.56 (0.27; 9.22)           | Yes        |
| 63: | 72.84 (0.00; 1344956.15)    | Yes        |
| 64: | 1.43 (0.22; 9.55)           | Yes        |
| 65: | 1.18 (0.82; 1.69)           | No         |
| 66: | 1.45 (0.71; 2.98)           | No         |
| 67: | 1.03 (0.56; 1.89)           | No         |
| 68: | 1.14 (0.82; 1.59)           | No         |
| 69: | 1.84 (0.77; 4.41)           | Yes        |
| 70: | 1.26 (0.26; 6.13)           | Yes        |
| 71: | 1.97 (0.30; 12.85)          | Yes        |
| 72: | 1.85 (0.83; 4.11)           | Yes        |

hr\_all            eff

eff\_mod  
1:                  Sex  
2:                  Sex  
3:                  Sex  
4:                  Sex  
5:                  Sex  
6:                  Sex  
7:                  Sex  
8:                  Sex  
9:  N° pregnancies  
10: N° pregnancies  
11: N° pregnancies  
12: N° pregnancies  
13: N° pregnancies  
14: N° pregnancies  
15: N° pregnancies  
16: N° pregnancies  
17:                  Preterm  
18:                  Preterm  
19:                  Preterm  
20:                  Preterm  
21:                  Preterm  
22:                  Preterm  
23:                  Preterm  
24:                  Preterm  
25:  Maternal age  
26:  Maternal age  
27:  Maternal age  
28:  Maternal age  
29:  Maternal age  
30:  Maternal age  
31:  Maternal age  
32:  Maternal age  
33:  Birthweight  
34:  Birthweight  
35:  Birthweight  
36:  Birthweight  
37:  Birthweight  
38:  Birthweight  
39:  Birthweight  
40:  Birthweight  
41:  HIV status  
42:  HIV status  
43:  HIV status  
44:  HIV status  
45:  HIV status  
46:  HIV status  
47:  HIV status  
48:  HIV status  
49:  Labour problems  
50:  Labour problems  
51:  Labour problems  
52:  Labour problems  
53:  Labour problems

54: Labour problems  
55: Labour problems  
56: Labour problems  
57: APH  
58: APH  
59: APH  
60: APH  
61: APH  
62: APH  
63: APH  
64: APH  
65: Hypertensive  
66: Hypertensive  
67: Hypertensive  
68: Hypertensive  
69: Hypertensive  
70: Hypertensive  
71: Hypertensive  
72: Hypertensive  
    eff\_mod
